# Supplementary material for: Uncovering Trait Associations Resulting in Maximal Seed Yield in Winter and Spring Oilseed Rape
Source: Front Plant Sci. 2021 Sep 6;12:697576. doi: 10.3389/fpls.2021.697576 (PMC8450599; doi:10.3389/fpls.2021.697576)
Supplement: Supplementary file 2 [file Table_4.xls]

## Sheet: backtransform_mean_all (003)
Supplementary Table S4. Predicted means of each genotype resulted from a linear mixed model. Where variables were anlyaised on a transformed scale, means have been back-transformed to the original scale data.
ASSYST code	Four OSR groups	ON	OA	OL	GL	SL	BL	OAcvar	SY	SWM	PN	PNM	PN1S	PL	PH	NI	NI-1	PAM	PAS	PA	FN	OC	SAM	SCM	SA	SC	PA1S	PN1S	TGW	SN	TM	SAcvar	SNPPM	VLM
BnA028	Winter OSR	39.4439	0.111957	4.74974	7.26989	2.18032	1.27502	14.4671	19.0419	0.854085	232.601	46.8897	183.699	6.59595	173.729	8.00599	6.99045	38.6623	45.0106	43.8875	415.73	43.4781	3.53577	0.883403	3.6796	0.87465	43.9301	27.4613	5.16423	3739.35	246.655	11.4452	15.5656	5.33906
BnA040	Winter OSR	27.1971	0.120353	4.63365	6.91611	2.03441	0.942833	13.104	15.8532	0.4406	340.762	66.6515	270.937	4.23873	161.578	9.76782	8.78803	33.597	46.8976	43.8308	575.545	44.0789	3.34633	0.915692	3.48078	0.935605	40.8688	31.4654	5.55944	2885.9	252.063	13.2602	8.43251	3.32806
BnA053	Winter OSR	30.6302	0.117645	4.7097	7.19339	2.30043	1.28633	12.9512	20.2057	0.928766	258.247	64.8429	199.61	7.31389	179.423	7.11208	6.11409	27.9716	45.2961	42.3159	446.421	47.3933	3.03103	0.887319	3.01649	0.901061	45.3528	31.6912	4.12169	4882.11	248.187	10.1437	21.1769	6.03342
BnA055	Winter OSR	36.7965	0.11709	4.68126	6.71038	1.6242	1.02863	15.7404	18.7494	1.23588	237.014	46.8355	186.248	7.07883	142.722	7.09105	6.07544	14.9339	20.9373	20.1134	287.726	46.4673	3.66284	0.868374	3.45997	0.873261	20.9187	29.0843	4.83565	3865.75	241.684	13.1297	21.57	5.93698
BnA090	Winter OSR	31.2457	0.13061	4.62078	7.11842	2.1224	0.997962	15.2806	16.2529	0.8682	204.699	37.1553	169.256	6.67528	136.235	8.39534	7.3777	24.5536	28.8524	27.7235	300.493	41.7615	3.66937	0.910441	3.89326	0.922077	31.3993	21.6423	6.05213	2637.75	247.92	14.7597	14.8218	5.52513
BnA091	Winter OSR	33.2353	0.119226	5.07001	7.03487	1.84114	0.849747	10.6991	10.8049	0.404632	423.561	53.5169	371.354	4.13342	161.71	10.9283	9.92784	38.7733	34.42	36.3591	665.694	38.9708	3.84425	0.920299	3.84315	0.921456	31.5207	41.0527	6.58839	1770.93	253.225	13.047	5.60885	3.26044
BnA093	Winter OSR	30.6947	0.106063	4.58567	6.91017	2.05534	1.11767	14.3705	20.4645	0.82025	359.805	69.9877	287.517	6.92419	173.336	9.07636	7.97378	13.0533	21.761	20.2029	452.107	47.1685	3.08415	0.860585	3.00705	0.867834	21.0401	38.557	4.06596	5048.87	252.286	12.3739	17.6975	5.69443
BnA096	Winter OSR	35.7524	0.121285	5.83406	8.07407	1.8828	1.04237	14.0702	18.8535	0.726594	280.878	81.8611	196.145	6.21126	188.55	5.95699	4.91833	13.8441	37.6536	31.1235	377.179	46.5522	3.20634	0.92356	3.08105	0.931707	30.9189	39.7232	4.61823	4105.23	251.834	12.3076	14.6709	5.08262
BnA097	Winter OSR	34.2681	0.117328	4.42072	6.80208	2.17774	1.02377	12.9039	19.389	0.637799	269.12	67.2524	198.761	5.41707	174.081	6.92273	5.89475	22.3813	33.7146	31.1908	380.429	46.2891	3.40207	0.891372	3.12059	0.900552	31.0429	33.5635	4.35102	4453.81	249.097	12.1719	13.8587	4.39889
BnA098	Winter OSR	32.5611	0.114808	4.92896	7.28372	2.07916	1.32376	13.3431	19.9762	1.1201	332.645	62.8155	266.565	8.31374	160.748	7.00783	5.9841	36.9913	33.245	34.3464	469.369	45.4195	3.14072	0.852699	3.10918	0.878902	33.9552	37.4685	4.39627	4487.05	247.656	11.6058	24.0325	6.98069
BnA099	Winter OSR	34.2554	0.117313	5.55827	7.6556	1.95221	0.937043	11.5043	14.8745	0.455638	366.939	49.2053	312.479	5.29723	152.714	11.1586	10.116	35.4014	46.3262	46.1828	621.447	43.2556	3.11078	0.919538	3.02761	0.918002	41.2307	31.2215	4.50451	3324.39	250.136	14.4655	10.5602	4.27302
BnA101	Winter OSR	34.3623	0.124874	4.81429	6.88733	1.85907	1.0877	11.5531	17.7963	0.857868	367.703	58.4407	299.329	6.9046	176.321	9.7035	8.52124	25.6436	37.036	36.2518	546.989	45.146	3.04728	0.922272	3.11151	0.925247	38.5718	32.6598	4.56203	3951.42	252.759	11.3228	19.4565	5.81801
BnA102	Winter OSR	31.1579	0.135369	4.27776	6.68934	2.1846	0.988053	13.2624	13.5824	0.593201	395.05	62.9499	332.263	4.55024	189.142	11.8565	10.8389	26.0698	39.0578	37.7266	619.21	34.9314	3.02227	0.906166	3.23301	0.902357	39.1385	30.6174	4.39975	3073.59	252.803	15.9273	12.2817	3.56885
BnA105	Winter OSR	38.5639	0.122593	5.19329	7.69197	2.27207	0.940993	14.1248	18.214	0.88699	260.444	50.284	206.633	5.60021	174.678	8.77612	7.71714	28.2712	36.3006	34.8726	425.362	41.8058	3.99526	0.863177	3.92036	0.858807	41.1377	27.7343	6.31461	2830.37	249.051	17.1178	13.8361	4.63576
BnA106	Winter OSR	30.0106	0.110005	4.93846	7.39367	2.12384	1.3049	11.8615	20.2791	0.826553	292.131	45.7915	242.028	6.54872	152.124	10.6785	9.63386	39.1522	44.2805	43.5621	484.258	47.225	3.16098	0.938172	3.07513	0.943947	39.5833	25.4634	4.71879	4287.21	251.312	11.1351	15.8287	5.2338
BnA107	Winter OSR	30.3786	0.104904	4.56458	6.89411	1.89129	0.999805	12.0349	11.3438	0.331177	578.234	68.3785	505.704	4.32032	166.187	11.383	10.3274	29.1484	36.0398	35.5134	864.537	38.9953	2.79065	0.911693	2.9114	0.906338	36.6486	46.6563	4.56782	2557.15	249.934	11.3206	7.73776	3.30237
BnA108	Winter OSR	34.4478	0.118622	4.93789	7.18	2.0872	1.06391	12.5422	15.2602	0.842432	272.792	69.0154	203.416	6.0315	177.453	6.59102	5.55216	19.971	35.8555	32.4095	411.38	42.4989	2.9013	0.912311	3.05095	0.904587	39.494	38.4508	4.28547	3527.09	251.751	10.6365	18.1329	4.99879
BnA109	Winter OSR	27.03	0.119617	4.09388	6.34437	2.18723	1.06839	10.4274	20.4215	0.708271	348.241	74.6961	278.525	5.51714	171.567	8.03636	7.04141	17.3977	27.5994	25.6446	469.841	48.4454	3.10668	0.925135	3.14705	0.934257	23.573	40.5113	4.55601	4455.56	250.745	10.8905	16.5161	4.45749
BnA113	Winter OSR	41.6867	0.0907675	4.75158	7.26724	2.30285	1.14176	13.9014	12.5113	0.939019	280.528	49.8973	236.592	6.44506	184.751	9.40156	8.42262	22.5776	23.5137	23.0101	420.302	34.0509	3.90317	0.791774	3.93394	0.84513	31.8785	29.2817	5.47759	2257.22	251.457	13.9085	16.3418	5.26284
BnA133	Winter OSR	30.9524	0.106195	4.56819	6.95283	2.12771	1.0166	10.9545	15.091	0.540213	405.349	69.4613	336.604	5.24528	195.434	9.81475	8.80656	32.789	37.8429	37.3115	692.608	42.2972	3.31012	0.940228	3.37194	0.938518	40.2289	37.4474	5.5155	2861.53	250.113	13.5927	9.6708	4.20042
BnA137	Winter OSR	37.4968	0.122516	5.15107	7.52458	2.04468	0.974651	12.489	16.4113	0.696091	285.172	69.9307	213.519	5.89572	188.044	7.23922	6.18409	19.6324	34.6227	31.9041	389.616	41.7321	3.15551	0.896497	3.15565	0.902378	25.4618	34.4795	4.47635	3626.93	247.021	14.2166	14.0003	4.85669
BnA139	Winter OSR	30.6776	0.116862	4.30497	6.39251	1.93383	0.975013	10.973	16.6393	0.561195	352.96	86.2395	264.801	5.54255	181.85	6.9912	5.97354	15.5685	16.4243	15.9881	428.136	44.6211	2.79502	0.871051	2.97689	0.899236	15.2536	47.3044	4.15699	4029.8	252.058	9.67992	14.2956	4.4908
BnA150	Winter OSR	31.1549	0.105372	4.13576	6.33271	1.9119	1.29012	13.2691	14.4979	0.619079	290.398	65.5457	225.903	5.57914	176.675	8.21525	7.2026	34.6239	57.7403	54.2602	601.35	44.7985	3.3182	0.903165	3.45026	0.912342	54.0859	29.617	5.58653	2763.51	249.918	11.2906	15.3757	4.39497
BnA160	Winter OSR	37.4505	0.127473	5.45686	7.87943	2.18845	1.30534	12.2246	18.3191	1.10544	220.974	77.124	141.343	7.86642	187.04	4.77819	3.74215	32.9963	42.9265	39.7593	360.579	48.7348	3.1943	0.852523	3.20764	0.865369	43.3349	37.5844	4.36837	4235.28	251.718	9.82868	23.5715	6.63623
BnA168	Winter OSR	36.0976	0.110236	5.0908	7.22257	1.87671	0.836461	11.1196	13.7002	0.810964	257.116	71.1573	185.585	6.11858	174.322	5.35181	4.27046	16.2344	34.0514	29.4891	351.647	40.2429	3.48132	0.879279	3.39825	0.89866	30.9639	42.8573	4.64756	2965.84	248.118	12.2427	15.9697	5.27381
BnA172	Winter OSR	32.9691	0.120026	4.3794	6.66616	2.04286	1.1698	13.9865	14.4553	0.446618	389.011	66.66	315.204	5.09664	177.855	9.40052	8.35775	28.3748	43.332	42.0069	627.977	42.0671	2.99813	0.91212	3.21003	0.910387	44.37	35.7831	4.72274	3066.33	248.466	12.291	9.68989	4.00057
BnA185	Others	23.9348	0.114334	3.30579	5.53773	2.2852	1.20215	13.0154	7.79393	0.368483	561.137	64.8907	486.457	5.50199	256.987	13.4091	12.3053	55.5918	51.2766	52.1353	1112.09	39.2076	3.00383	0.913029	3.06029	0.897262	50.5157	36.1855	4.64363	1711.75	250.642	10.9577	7.74676	4.26798
BnA186	Others	34.9721	0.13952	4.93494	7.50527	2.23676	1.1889	14.7159	15.3719	0.821488	282.624	69.3971	212.859	7.01747	187.261	6.11593	5.1185	26.7316	36.9667	35.0775	415.622	43.4723	2.65913	0.950054	2.90986	0.947513	36.143	37.4185	4.16696	3667	251.977	10.4494	21.1281	5.80584
BnA190	Others	29.5691	0.12932	5.01992	7.82594	2.54467	1.35278	13.548	15.715	0.530842	354.869	69.5784	280.281	5.84159	162.998	6.99951	5.8877	29.036	35.6396	34.4354	529.35	41.1991	3.14489	0.925713	3.17916	0.93181	39.0104	43.1303	5.00369	3170.82	252.979	12.2161	9.73594	4.40973
BnA193	Others	27.4641	0.125337	5.16462	7.88094	2.5704	1.02385	10.3663	15.2251	0.450891	354.726	65.1275	289.052	4.76521	180.869	9.1778	8.13622	27.3642	29.1053	29.3557	536.62	43.879	2.98925	0.91203	3.1367	0.917473	32.0181	39.195	4.31086	3634.57	249.901	13.1804	10.6861	3.7063
BnA194	Others	29.0553	0.148076	4.93292	7.10634	1.99758	0.762777	19.6958	5.10287	0.378329	129.351	68.5241	54.1895	4.30088	202.855	2.03547	1.02119	35.0696	23.6199	29.5855	175.938	37.0401	3.17424	0.922761	2.96926	0.920774	20.6144	47.8748	4.87125	1074.75	253.596	20.1024	8.10341	3.56301
BnA203	Others	31.6026	0.131367	4.54135	6.71426	1.98641	1.01521	13.5564	17.979	0.752353	334.874	53.7451	277.368	5.76154	169.847	8.98885	7.97981	22.5305	28.3716	27.7288	442.462	45.061	3.25997	0.919385	3.32748	0.931074	25.7251	34.4932	4.99581	3691.61	247.685	11.1286	15.4958	4.80159
BnA204	Others	33.2522	0.10677	4.84019	7.06587	1.99784	0.836811	13.5345	15.0697	0.496992	355.658	67.2477	291.868	4.5781	224.527	9.74841	8.68272	39.3275	44.1112	43.3083	674.789	41.2884	3.75788	0.940746	3.94009	0.929671	44.5977	39.2417	6.57505	2282.3	251.372	10.5757	7.61672	3.75879
BnA206	Others	36.1957	0.116958	5.13401	7.312	1.9003	0.788901	12.7436	13.7324	0.482307	391.83	74.072	324.301	4.62036	239.268	8.7694	7.73792	44.1985	39.2642	40.1929	656.33	37.7378	3.87257	0.919307	4.15044	0.911704	41.3443	41.2976	7.15678	1940.55	253.212	10.9492	7.19365	3.81886
BnA207	Others	33.3266	0.126136	4.72722	7.04731	1.95922	0.995633	11.215	16.8159	0.650932	341.584	44.3679	296.674	5.59783	149.406	12.3149	11.2418	39.7253	37.1456	39.3664	562.674	43.8918	3.28119	0.910248	3.34732	0.916595	34.8995	27.4744	5.34888	3423.36	251.982	14.4699	12.943	4.50883
BnA208	Others	36.3806	0.112606	4.75359	7.15537	2.12119	0.962892	11.0162	15.9686	0.792257	295.786	63.8217	228.235	6.43737	175.975	7.46593	6.45079	33.9516	44.7573	43.2924	499.855	46.8396	2.73106	0.874601	2.95813	0.873558	45.6482	33.0404	3.88532	4034.91	253.036	10.5418	20.1342	5.39976
BnA209	Others	35.3613	0.112908	4.63339	7.00711	2.14905	1.05001	10.8212	9.72867	0.449717	383.358	145.274	223.105	5.47557	210.761	3.58462	2.43559	7.16633	21.0305	16.3427	425.102	34.9434	2.10824	0.917779	2.15481	0.930089	18.499	70.1915	2.58064	3630.25	262.816	12.0566	13.7923	4.42612
BnA211	Others	30.9732	0.128448	4.73568	6.97122	2.01888	0.95595	13.9195	18.2	0.589726	461.239	40.8435	419.575	5.8574	165.039	14.4957	13.3933	38.319	30.1641	30.4406	658.647	40.6902	2.74826	0.922366	2.75406	0.933768	30.1113	33.509	3.50371	5200.6	251.355	12.1846	15.4349	4.95926
BnA212	Others	28.1586	0.133647	4.93946	7.75196	2.57045	1.53296	11.9492	15.6063	0.563505	290.96	84.3039	204.28	5.96394	189.787	5.82398	4.73475	28.3195	38.2483	34.8343	460.878	40.8239	3.47696	0.93555	3.47173	0.938112	40.8572	43.924	5.66465	2749.26	247.373	9.61651	9.02747	4.47791
BnA213	Winter OSR	36.2447	0.102677	4.87053	7.28902	1.97868	1.08048	15.476	16.0976	0.513278	488.113	83.0672	408.044	5.99897	190.985	10.7965	9.77199	11.7012	25.184	22.7744	672.979	45.1835	3.33035	0.924392	3.52066	0.920984	25.8233	45.667	5.71855	2927.32	245.338	12.3709	9.59543	4.8076
BnA218	Others	34.4488	0.11907	5.12953	7.36457	1.92292	0.988339	14.4247	12.1775	0.698777	187.558	58.5043	130.431	5.76381	187.874	5.17792	4.20936	28.5434	42.958	39.2994	304.029	38.6537	3.33068	0.891105	3.44993	0.905735	41.3723	29.8607	5.36584	2354.8	252.677	12.6088	13.1033	4.72103
BnA221	Others	31.0848	0.113385	4.41625	6.93572	2.18604	1.095	12.0836	18.1351	1.01056	235.878	47.635	176.888	7.0939	139.647	8.88574	7.88998	45.5008	52.4787	51.3875	505.69	47.3063	3.14334	0.890751	3.33606	0.904414	53.3231	23.88	4.88812	3749.7	253.81	11.4387	19.7916	5.9653
BnA229	Semiwinter OSR	31.3366	0.133277	5.17012	8.09381	2.77266	1.46581	13.3609	11.6621	0.883221	181.311	45.2308	135.123	6.85883	150.89	8.5108	7.49616	29.4715	41.4285	39.1173	287.08	40.7729	4.2522	0.905465	4.53128	0.904804	43.2825	17.3719	7.0014	1687.35	247.303	13.9428	12.822	5.31447
BnA230	Semiwinter OSR	29.6905	0.129517	5.84747	8.94482	2.73095	1.00416	19.5606	10.5573	0.623558	171.64	38.1881	133.236	6.23511	150.843	8.65785	7.64064	38.057	36.5895	36.5068	272.43	33.7848	3.70204	0.862248	3.55897	0.887922	34.0956	18.5542	5.65983	1939.26	256.491	14.2323	10.2184	5.20983
BnA237	Semiwinter OSR	32.9363	0.119285	5.4471	8.03193	2.11505	1.00455	12.655	14.8189	0.798504	242.718	48.9627	190.989	7.27107	155.357	8.70565	7.68726	18.6536	29.5542	27.3978	327.07	42.208	2.75192	0.939489	2.85811	0.937049	28.8819	22.8511	3.80176	3820.04	250.074	14.8654	19.4492	6.23409
BnA238	Spring OSR	36.6559	0.110753	4.74747	7.01463	1.97886	1.2829	12.7352	12.2711	0.701834	266.308	38.9722	231.606	7.35038	168.321	11.7009	10.6807	23.1451	40.1701	37.8319	415.572	38.7673	2.85445	0.926175	3.1215	0.929954	36.3435	22.9716	4.51978	2781.41	230.452	13.8289	18.1021	6.01282
BnA239	Spring OSR	31.325	0.104148	4.24092	6.09157	1.68812	0.783945	13.5871	4.35964	0.287038	155.659	28.5563	128.356	3.72333	179.345	15.6996	14.4763	51.4293	83.6808	82.5673	577.463	28.9409	2.96532	0.919716	2.90929	0.90004	59.5584	11.3853	4.0904	1459.89	229.705	17.8	12.4611	2.87941
BnA240	Spring OSR	39.0535	0.107468	4.86655	6.69173	1.58092	1.0133	13.2702	14.9948	0.891847	203.499	46.7837	154.865	5.91411	143.368	9.27328	8.27266	17.8234	23.5501	22.2857	270.547	46.1075	2.7385	0.892269	2.93598	0.903206	21.5633	19.3157	3.97207	3724.98	229.598	12.642	25.2164	4.95323
BnA245	Spring OSR	39.5412	0.100051	5.14784	6.94417	1.58181	0.907516	12.2659	15.8541	0.758589	247.294	53.1308	191.268	6.55956	151.876	8.22123	7.21547	14.2137	24.404	22.0411	315.751	45.3549	2.64299	0.93106	2.71237	0.935658	24.5429	28.5474	3.74082	4281.82	227.059	14.5489	20.1012	5.62056
BnA251	Spring OSR	34.9072	0.124529	5.4209	7.95021	2.20121	2.26202	11.7415	9.80038	0.633283	156.872	33.4483	125.127	10.4924	140.413	8.04939	7.04664	9.05966	6.51417	5.7787	171.195	38.3109	3.16686	0.944713	3.22969	0.936067	28.7975	16.925	4.69923	2083.96	198.148	13.6814	15.5555	8.18728
BnA256	Spring OSR	29.6998	0.0933448	4.38902	6.12469	1.43759	0.678656	15.0838	8.8167	0.635117	263.171	54.3878	219.096	4.79504	142.28	10.5909	9.61537	27.7445	39.2272	37.3108	425.998	34.6301	3.15877	0.848832	3.64793	0.876073	36.3679	25.3885	4.76687	1806.86	231.597	16.2134	9.41533	3.97418
BnA257	Spring OSR	32.7407	0.107867	4.88547	7.08924	2.05484	0.860497	14.4826	9.58865	0.427369	293.257	53.3553	238.323	5.55483	129.758	10.574	9.46176	20.5046	25.0296	23.6521	384.455	33.6825	2.41599	0.820924	2.799	0.822159	21.8596	23.7841	3.59297	2701.56	222.141	16.6972	14.7206	4.74373
BnA258	Spring OSR	31.2159	0.0978605	4.88815	7.0244	1.67239	1.19851	13.2566	14.4178	0.818494	285.678	54.8326	229.47	7.06925	138.498	10.205	9.20871	14.4522	16.5542	16.1663	337.568	46.1509	2.45496	0.922488	2.61849	0.932317	16.9327	24.42	3.79995	3815.08	221.946	11.3999	23.8293	5.88925
BnA259	Spring OSR	32.0612	0.0961049	4.88514	6.53294	1.4187	0.74094	15.4704	9.22705	0.502472	275.324	22.2969	248.662	5.10848	138.105	12.9781	11.9499	38.577	42.6546	42.5128	457.073	41.1024	3.03919	0.944835	3.22851	0.940042	38.9701	21.8723	4.87646	1870.38	230.328	13.3934	10.2823	4.38852
BnA260	Spring OSR	27.7197	0.104894	5.5008	7.98101	2.1296	1.02137	18.2436	7.67102	0.529311	275.951	29.1139	246.376	5.84022	128.787	19.2288	18.2754	21.3914	30.3338	28.805	380.715	37.7947	3.37871	0.903188	3.44342	0.902589	36.1789	13.0512	5.73824	1296.87	223.854	14.1486	9.6032	4.80995
BnA261	Spring OSR	29.0461	0.112228	4.88935	7.52781	2.54793	0.799271	16.5736	3.7873	0.184091	144.057	8.55563	132.803	3.45468	154.417	30.4476	29.1735	85.2682	89.2974	89.1587	1169.33	27.3984	3.20806	0.924972	3.042	0.921455	87.7908	4.05383	4.52923	905.235	235.353	16.6259	3.77463	2.72882
BnA263	Spring OSR	41.8648	0.104477	5.43969	7.9479	2.18141	1.15465	12.3827	14.8151	0.824523	270.573	39.8141	233.495	6.12098	158.171	12.5251	11.5915	26.0392	22.4985	23.4399	354.644	44.5569	2.69471	0.935181	2.82761	0.94359	25.8419	20.7938	3.78512	3986.8	230.741	11.4026	20.0508	4.99024
BnA264	Spring OSR	33.9833	0.0973479	4.72911	6.60989	1.68666	0.944948	13.1854	10.3386	0.502015	262.079	45.2707	215.948	5.44032	158.781	10.722	9.69012	25.3784	38.5223	36.5059	419.986	36.4897	3.1362	0.868795	3.19012	0.892944	37.5099	22.2776	4.30264	2343.84	230.423	20.2244	11.8652	4.59837
BnA268	Spring OSR	30.2217	0.111881	4.69538	6.87363	1.80969	1.58988	13.0396	15.9891	1.10368	222.256	49.3854	170.907	8.93387	164.132	7.98517	6.92207	35.7369	13.8551	17.381	291.756	45.2617	2.65806	0.926611	2.72326	0.926961	26.5133	22.0594	3.76373	4201.05	233.515	10.1387	27.6393	7.28755
BnA269	Spring OSR	28.5576	0.104984	3.73116	6.2793	2.3804	1.53406	11.6559	15.8289	0.671042	317.923	46.8288	270.021	6.99483	167.181	9.73755	8.7302	24.1985	29.437	28.8805	422.04	45.7202	2.58483	0.908517	2.65962	0.915362	32.7779	28.3156	3.72145	4314.35	225.218	9.80419	17.6611	5.43447
BnA270	Spring OSR	32.3479	0.0997551	4.32438	6.30702	1.72665	0.67364	13.5501	6.36092	0.220244	254.46	37.6781	211.777	3.08003	190.854	15.2524	14.0164	52.0726	65.2696	63.8626	594.224	32.5039	3.1375	0.911993	3.32289	0.923433	58.601	13.263	5.23787	1190.83	234.76	13.152	3.57501	2.37896
BnA271	Others	33.5609	0.0894124	5.05437	6.75354	1.6711	0.931142	17.1582	6.50258	0.362401	302.494	54.4962	240.546	6.97537	158.099	9.18101	8.04389	10.7548	17.7307	17.2088	340.685	29.0948	2.53393	0.800018	4.37452	0.860136	15.1113	28.8944	4.89322	1362.87	228.357	16.9553	17.3461	6.06157
BnA273	Spring OSR	39.5963	0.10899	5.69165	8.35539	2.25177	1.06146	14.4192	13.4298	0.577643	303.242	44.3437	262.211	5.90342	152.35	12.673	11.6413	13.0469	23.3361	21.6261	406.902	45.2095	2.25698	0.92298	2.32311	0.921451	23.3728	22.9197	2.91319	4702.48	218.515	12.981	19.0618	4.89144
BnA274	Spring OSR	34.3122	0.105086	4.48355	6.60548	1.78399	0.91859	16.3031	14.6999	0.684869	235.036	46.948	185.999	5.67212	135.867	8.90185	7.85455	40.113	13.18	27.3937	337.939	45.4911	2.41718	0.92165	2.47892	0.919883	28.29	23.8985	3.14099	4676.4	220.344	10.223	20.0967	4.74796
BnA275	Spring OSR	34.5629	0.123556	5.22744	7.89838	2.38374	0.916162	14.4825	13.4843	0.61418	286.641	58.3048	229.795	5.40218	162.907	10.6227	9.68273	16.7776	14.0438	18.6919	357.114	44.576	2.31089	0.939145	2.45649	0.944248	19.5189	23.3865	3.25949	4069.69	209.199	14.8186	19.6443	4.48358
BnA283	Spring OSR	33.6036	0.111651	4.80342	6.97387	1.81939	0.999201	14.9922	13.8979	0.652448	302.959	41.9613	257.197	5.15173	149.862	11.9171	10.8365	30.3995	35.4199	34.7951	435.226	43.9062	3.13699	0.916107	3.26929	0.924175	29.5321	22.9609	4.20227	3360.74	234.111	13.3092	15.1604	4.22722
BnA307	Spring OSR	32.481	0.108324	5.55736	7.88861	2.17339	1.01887	12.0095	13.1023	0.905757	291.366	28.85	261.767	7.32483	115.291	13.5257	12.4576	26.491	30.3374	30.3463	408.732	41.6701	2.30409	0.925915	2.47461	0.918744	28.6285	21.2458	3.45725	3828.14	231.891	10.4929	25.965	6.28083
BnA394	Spring OSR	33.7814	0.101737	4.60626	6.99776	2.22046	1.25684	18.3002	13.8787	0.850091	257.299	57.2037	208.486	6.71284	149.978	11.2367	10.185	18.3945	12.0893	12.0853	407.276	42.5933	3.13554	0.903548	3.28319	0.911621	35.7537	24.0816	4.51368	3097.22	211.939	14.8621	18.5123	5.48991
BnA401	Others	28.765	0.111718	4.31466	7.1705	2.62585	1.68158	9.59786	8.40375	0.321606	270.804	58.6686	210.122	5.63406	198.46	7.67664	6.65895	47.0832	53.5404	52.8248	549.364	34.9964	1.9894	0.93879	1.9856	0.943848	52.6758	30.2185	2.54815	3315.03	256.131	9.13793	12.3079	3.81769
BnA410	Others	36.2938	0.118474	4.92284	7.40496	2.10165	1.40249	11.6859	11.4688	0.671469	258.712	54.5475	200.338	6.64539	172.391	7.30003	6.22625	44.2209	51.9785	49.9094	489.264	39.8037	2.65585	0.87368	2.94419	0.880602	47.6689	31.7476	3.88171	2841.12	252.708	12.9314	18.1419	5.20625
BnA411	Others	27.1637	0.118881	4.8836	7.22119	2.21491	1.09423	11.0647	7.15425	0.321263	225.413	63.098	162.005	4.78666	168.526	6.4404	5.33212	44.0723	53.2628	50.1282	446.335	32.8955	2.08922	0.917076	2.15492	0.94247	45.725	34.0621	2.745	2669.52	258.017	14.3242	9.75591	3.76105
BnA414	Others	29.4568	0.102816	4.41352	6.65934	2.00034	1.03543	16.1355	6.18475	0.521567	127.415	26.5842	110.525	5.4652	226.326	12.0987	10.8601	86.7523	91.388	91.2203	989.186	38.8525	2.67508	0.911823	2.79421	0.925384	77.5993	14.3329	3.8818	1893.07	250.294	9.31343	13.4961	4.34139
BnA418	Others	34.2257	0.12072	4.8315	7.66537	2.57923	1.42093	11.6688	12.1578	0.392691	307.136	57.4007	245.585	5.89282	180.182	8.77281	7.82158	24.1044	28.7827	28.193	425.605	39.5967	2.16608	0.885523	2.14836	0.897602	30.0144	29.9564	2.64058	4566.64	256.496	11.0432	13.7699	4.48979
BnA436	Others	33.0385	0.128153	4.66463	6.52532	1.66644	0.986276	14.4994	20.6776	0.736915	281.878	74.5823	210.364	5.92073	167.773	8.21774	7.14758	17.9032	33.8157	30.4108	413.012	48.144	3.25446	0.894711	3.21518	0.902591	32.9633	29.5382	4.48915	4575.03	249.144	9.72251	14.9792	4.96783
BnA438	Others	42.3271	0.112879	4.94178	7.34151	2.27948	1.34387	15.5084	10.4398	0.399725	290.204	75.2497	211.842	5.19512	177.871	5.52072	4.49227	22.7402	30.6188	29.0121	389.56	40.6466	2.27475	0.90992	2.26592	0.91525	30.9565	43.4884	2.80394	3676.32	251.024	10.4344	13.3633	3.82637
BnA448	Others	29.8992	0.0978851	3.84324	6.54007	2.45566	1.38278	15.2355	10.7523	0.213438	625.922	83.5169	537.884	4.77133	204.212	12.6741	11.6236	27.7062	48.9729	45.0306	1158.98	40.9731	2.07195	0.9025	2.10925	0.898933	45.0147	48.6807	2.54646	4288.45	256.895	13.1315	8.76535	3.4593
BnA509	Winter OSR	35.3245	0.112621	4.66276	6.82441	2.00975	0.882808	13.9451	16.7477	0.713703	327.63	67.2126	257.116	5.03364	163.277	7.4374	6.3486	19.453	24.01	23.2788	443.381	45.337	3.24532	0.883728	3.36207	0.885592	25.7288	38.0001	5.00092	3735.24	248.308	13.3557	14.0516	4.19941
BnA510	Winter OSR	38.3213	0.109368	4.80119	7.163	2.10017	1.19358	11.0106	14.981	0.923526	215.793	46.0307	167.938	6.82922	164.875	8.53033	7.47671	8.81491	27.8176	24.3011	274.728	41.3987	3.24719	0.878096	3.42047	0.881778	26.3258	22.0758	4.95813	3056.58	250.234	12.5379	18.6347	5.7147
BnA511	Winter OSR	35.4693	0.102703	5.21346	7.55735	2.08818	0.926155	12.1265	14.0706	0.759035	285.676	59.8185	229.361	5.37015	174.774	9.34011	8.34175	23.8804	33.4919	32.1037	429.984	41.1503	4.23016	0.922028	4.37989	0.9197	33.853	28.1254	7.27927	1924.71	249.627	12.3849	10.7279	4.35849
BnA512	Winter OSR	39.984	0.0984637	4.50553	6.7218	1.98136	1.22779	17.0443	11.5834	0.678307	211.972	45.5102	164.702	6.04371	166.801	8.84736	7.82168	23.4817	39.832	36.5233	353.019	37.2364	3.74534	0.838057	3.62211	0.873596	42.8523	22.3811	5.37587	2171.55	253.203	17.6973	11.2657	4.77208
BnA513	Semiwinter OSR	28.218	0.131524	4.82946	6.98147	1.91251	0.920031	11.9836	3.34353	0.440537	91.5547	24.7941	72.0804	5.18341	181.419	11.6549	10.5286	67.8477	90.591	88.0542	497.257	23.9671	3.84142	0.912288	4.01783	0.899857	71.8392	11.4181	6.04647	918.088	251.214	17.1136	6.59413	4.04874
BnA514	Winter OSR	41.6502	0.11874	4.92307	7.32038	2.08755	1.26615	14.1446	17.0562	1.01061	193.399	57.43	137.672	6.90382	168.801	6.48484	5.48394	23.7891	41.8343	37.8036	307.87	43.8638	3.65397	0.881248	3.47224	0.889069	39.656	24.2238	5.08188	3467.43	254.331	13.1734	18.5717	5.5912
BnA515	Winter OSR	36.8132	0.108993	5.35661	7.43017	1.89299	0.926855	11.6872	13.0334	0.495299	261.63	54.9908	209.762	4.95184	163.305	10.725	9.65178	31.7567	94.6352	94.501	590.124	48.2673	3.50817	0.91582	3.10012	0.916134	32.5444	28.4347	4.26017	3824.7	251.175	11.4167	10.505	3.9077
BnA516	Winter OSR	35.4793	0.118994	4.62436	6.86299	1.95881	0.708799	11.4622	5.38228	0.321219	21.7897	13.2121	22.6405	3.98358	202.104	21.4008	20.0439	91.3318	99.2104	99.1963	940.722	30.1	3.70674	0.905045	4.15703	0.90277	85.1173	12.3747	6.13346	1529.14	245.79	10.5812	7.8846	3.12197
BnA517	Winter OSR	35.9568	0.108641	5.15523	7.65851	2.2846	1.09944	13.9516	18.4134	0.844657	393.774	112.911	281.152	5.57629	181.466	5.5028	4.44365	14.5966	23.2266	20.4713	500.039	46.4366	3.08146	0.884891	2.92297	0.908556	26.1529	64.4237	4.05053	4618.73	248.166	12.9287	17.8193	4.47973
BnA518	Winter OSR	39.138	0.104237	4.61847	6.94281	2.03797	1.02158	12.1458	18.7585	0.886677	233.132	63.7034	167.607	6.27965	173.442	5.8543	4.86456	17.2251	30.0077	26.8592	314.347	47.2701	3.29063	0.890869	3.1602	0.896458	30.5061	32.4185	4.49461	4213.18	254.456	12.537	19.0817	5.19402
BnA520	Semiwinter OSR	31.7286	0.13542	5.75104	8.29923	2.18671	1.44655	11.8927	8.85441	0.595111	232.474	46.5006	179.994	6.11576	169.529	7.66144	6.61917	17.9708	33.4396	30.8836	316.08	37.102	3.47173	0.902047	3.78678	0.910264	35.8226	25.2238	6.04953	1463.79	252.413	15.3989	10.3367	4.9671
BnA521	Winter OSR	32.7622	0.127846	4.46328	6.3239	1.62218	0.909071	11.2656	15.91	0.60052	326.53	68.2137	258.009	5.07318	169.591	7.01942	5.99374	26.2388	27.6741	27.4033	467.363	49.0221	3.23468	0.901814	3.28283	0.908291	34.3922	42.157	4.76305	3426.44	248.391	12.6683	12.5156	4.18362
BnA522	Winter OSR	32.8115	0.121586	4.70956	6.95231	2.07813	0.990824	12.8045	21.2897	0.426482	464.414	76.9359	392.262	4.96658	178.252	9.50275	8.45597	26.2543	21.3572	22.8432	623.698	42.5057	3.08297	0.917754	3.00156	0.923181	21.3857	48.5147	4.292	4890.61	251.431	11.6913	9.84371	4.04884
BnA523	Winter OSR	32.7155	0.0983864	4.60803	6.59443	1.66508	0.946066	11.9763	13.0241	0.552483	330.302	59.123	272.033	5.33654	215.092	9.75601	8.75309	19.7484	29.4622	28.9883	448.37	35.286	3.36811	0.920732	3.63795	0.926801	26.326	30.7979	5.42004	2415.54	251.408	12.178	10.3645	4.38884
BnA524	Winter OSR	33.9098	0.109637	4.80211	7.27023	2.26712	1.13006	14.1962	19.5035	0.678633	322.501	90.2979	228.186	5.80754	156.843	5.75988	4.73817	15.7768	26.9224	24.4503	410.915	48.2023	3.0935	0.851812	2.93008	0.882714	27.2701	45.5266	3.97133	5083.62	252.614	12.5698	14.2193	4.77376
BnA526	Semiwinter OSR	34.1044	0.130384	5.57135	7.62998	1.62439	1.10888	14.5976	7.60889	1.02886	150.454	38.7963	107.236	7.60784	129.803	7.39039	6.25994	16.7027	25.9681	24.0267	188.15	25.3769	4.60482	0.862058	4.33515	0.88521	29.1356	15.6664	5.74132	1336.94	249.587	20.7934	17.3248	6.5874
BnA527	Winter OSR	37.1418	0.120971	4.86845	6.78903	1.6854	0.91275	10.942	17.2609	0.766849	237.515	71.2577	166.347	5.698	151.976	5.71583	4.68746	22.011	33.6427	29.7533	348.202	47.7466	3.22114	0.873667	3.15466	0.893348	32.1287	37.0663	4.26699	4057.01	247.873	11.165	15.3988	4.79047
BnA528	Winter OSR	34.2012	0.122365	5.23662	7.45332	2.00703	1.13382	15.2201	17.3215	0.723763	266.768	75.083	195.54	5.89599	168.285	6.33345	5.28974	14.3235	20.384	18.8696	353.601	45.945	3.28563	0.910973	3.47268	0.921493	20.2335	39.9426	5.10391	3447.29	253.112	10.2497	13.4078	4.75773
BnA529	Semiwinter OSR	28.5124	0.16103	5.93254	8.313	2.3832	1.35552	11.2108	3.37483	0.265222	234.897	33.8787	201.065	6.76007	134.649	12.3568	11.2706	5.59965	19.6762	18.0166	280.255	30.8006	4.42034	0.903436	4.34166	0.903801	21.169	16.0153	7.11078	477.565	248.989	12.7423	3.39724	5.36595
BnA530	Semiwinter OSR	30.6503	0.113844	4.81979	7.31615	2.12482	2.36235	12.0252	10.9547	1.24392	116.054	42.7321	75.0408	13.6194	135.142	5.95466	4.95194	24.0588	41.4006	35.9478	202.02	39.5903	3.64038	0.917602	3.73106	0.933995	49.3618	13.4951	6.05157	1766.09	248.044	10.1712	19.6789	11.3217
